# Supplementary material for: Complex coacervate micelles formed by a C18-capped cationic triblock thermoresponsive copolymer interacting with SDS
Source: Royal Society of Chemistry journal article supplement (doi:10.1039/c2sm26567b), 2012-01-01
Supplement: c2sm26567b.pdf [file c2sm26567b.pdf]

Table 1. Dynamic light scattering data from the fitting of the correlation functions at a scattering angle of 90°.

| Polymer conc. (wt %) | SDS conc. (mM) | Temp. (°C) | A <sub>f</sub> | τ <sub>f</sub> (s)    | R <sub>h,f</sub> (nm) | β    | τ <sub>sc</sub> (s)   | τ <sub>s</sub> (s)    | R <sub>h,s</sub> (nm) | B    |
|----------------------|----------------|------------|----------------|-----------------------|-----------------------|------|-----------------------|-----------------------|-----------------------|------|
| 0.05                 | 0              | 25         | 0.10           | 1.64·10 <sup>-4</sup> | 14.1                  | 0.79 | 1.47·10 <sup>-3</sup> | 1.68·10 <sup>-3</sup> | 145                   | 0.94 |
| 0.05                 | 0.2            | 25         | 0.074          | 1.00·10 <sup>-4</sup> | 8.6                   | 0.73 | 1.10·10 <sup>-3</sup> | 1.34·10 <sup>-3</sup> | 115                   | 0.94 |
| 0.05                 | 0.4            | 25         | 0.32           | 1.20·10 <sup>-4</sup> | 10.3                  | 0.69 | 9.15·10 <sup>-4</sup> | 1.18·10 <sup>-3</sup> | 101                   | 0.90 |
| 0.05                 | 0.6            | 25         | 0.58           | 2.19·10 <sup>-4</sup> | 18.9                  | 0.82 | 1.03·10 <sup>-3</sup> | 1.15·10 <sup>-3</sup> | 99.2                  | 0.94 |
| 0.05                 | 0.8            | 25         | 0.68           | 2.09·10 <sup>-4</sup> | 18.0                  | 1.00 | 4.71·10 <sup>-4</sup> | 4.70·10 <sup>-4</sup> | 40.5                  | 0.94 |
| 0.05                 | 1.0            | 25         | 0.056          | 1.71·10 <sup>-4</sup> | 14.7                  | 0.78 | 1.67·10 <sup>-3</sup> | 1.94·10 <sup>-3</sup> | 167                   | 0.95 |
| 0.05                 | 5.0            | 25         | 0.65           | 1.43·10 <sup>-4</sup> | 12.3                  | 0.91 | 3.44·10 <sup>-4</sup> | 3.59·10 <sup>-4</sup> | 30.9                  | 0.89 |
| 0.05                 | 10.0           | 25         | 0.42           | 1.58·10 <sup>-4</sup> | 13.6                  | 0.88 | 3.37·10 <sup>-4</sup> | 3.60·10 <sup>-4</sup> | 30.9                  | 0.90 |
| 0.05                 | 0              | 50         | 0.54           | 2.94·10 <sup>-4</sup> | 43.8                  | 0.97 | 7.91·10 <sup>-4</sup> | 8.03·10 <sup>-4</sup> | 120                   | 0.95 |
| 0.05                 | 0.2            | 50         | 0.62           | 2.08·10 <sup>-4</sup> | 31.0                  | 0.92 | 5.82·10 <sup>-4</sup> | 6.06·10 <sup>-4</sup> | 90.2                  | 0.90 |
| 0.05                 | 0.4            | 50         | 0.65           | 2.03·10 <sup>-4</sup> | 30.3                  | 0.92 | 6.25·10 <sup>-4</sup> | 6.50·10 <sup>-4</sup> | 96.7                  | 0.91 |
| 0.05                 | 0.6            | 50         | 0.73           | 1.59·10 <sup>-4</sup> | 23.7                  | 0.94 | 5.81·10 <sup>-4</sup> | 5.97·10 <sup>-4</sup> | 88.8                  | 0.89 |
| 0.05                 | 0.8            | 50         | 0.82           | 1.77·10 <sup>-4</sup> | 26.4                  | 0.91 | 7.80·10 <sup>-4</sup> | 8.13·10 <sup>-4</sup> | 121                   | 0.92 |
| 0.05                 | 1.0            | 50         | 0.42           | 3.07·10 <sup>-4</sup> | 45.7                  | 0.97 | 8.62·10 <sup>-4</sup> | 8.74·10 <sup>-4</sup> | 130                   | 0.90 |
| 0.05                 | 5.0            | 50         | 0.77           | 8.87·10 <sup>-5</sup> | 13.2                  | 0.88 | 2.65·10 <sup>-4</sup> | 2.82·10 <sup>-4</sup> | 42.0                  | 0.86 |
| 0.05                 | 10.0           | 50         | 0.56           | 1.10·10 <sup>-4</sup> | 16.4                  | 0.91 | 1.79·10 <sup>-4</sup> | 1.87·10 <sup>-4</sup> | 27.8                  | 0.91 |
| 0.5                  | 0              | 25         |                |                       |                       | 0.79 | 3.95·10 <sup>-3</sup> | 4.53·10 <sup>-3</sup> | 390                   | 0.94 |
| 0.5                  | 0.1            | 25         |                |                       |                       | 0.80 | 4.29·10 <sup>-3</sup> | 4.88·10 <sup>-3</sup> | 420                   | 0.92 |
| 0.5                  | 0.5            | 25         |                |                       |                       | 0.77 | 3.22·10 <sup>-3</sup> | 3.74·10 <sup>-3</sup> | 322                   | 0.95 |
| 0.5                  | 1.0            | 25         |                |                       |                       | 0.77 | 2.32·10 <sup>-3</sup> | 2.71·10 <sup>-3</sup> | 233                   | 0.94 |
| 0.5                  | 2.0            | 25         |                |                       |                       | 0.74 | 1.58·10 <sup>-3</sup> | 1.90·10 <sup>-3</sup> | 164                   | 0.86 |
| 0.5                  | 5.0            | 25         |                |                       |                       | 0.75 | 6.49·10 <sup>-4</sup> | 7.76·10 <sup>-4</sup> | 66.7                  | 0.94 |
| 0.5                  | 10.0           | 25         |                |                       |                       | 0.96 | 4.90·10 <sup>-4</sup> | 4.98·10 <sup>-4</sup> | 42.9                  | 0.94 |
| 0.5                  | 20.0           | 25         |                |                       |                       | 0.93 | 3.61·10 <sup>-4</sup> | 3.73·10 <sup>-4</sup> | 32.1                  | 0.95 |
| 0.5                  | 0              | 50         |                |                       |                       | 0.89 | 1.38·10 <sup>-3</sup> | 1.46·10 <sup>-3</sup> | 218                   | 0.94 |
| 0.5                  | 0.1            | 50         |                |                       |                       | 0.88 | 1.35·10 <sup>-3</sup> | 1.43·10 <sup>-3</sup> | 213                   | 0.94 |
| 0.5                  | 0.5            | 50         |                |                       |                       | 0.89 | 1.08·10 <sup>-3</sup> | 1.15·10 <sup>-3</sup> | 171                   | 0.94 |
| 0.5                  | 1.0            | 50         |                |                       |                       | 0.91 | 8.28·10 <sup>-4</sup> | 8.64·10 <sup>-4</sup> | 129                   | 0.94 |
| 0.5                  | 2.0            | 50         |                |                       |                       | 0.88 | 5.96·10 <sup>-4</sup> | 6.37·10 <sup>-4</sup> | 94.8                  | 0.93 |
| 0.5                  | 5.0            | 50         |                |                       |                       | 0.90 | 2.96·10 <sup>-4</sup> | 3.11·10 <sup>-4</sup> | 46.3                  | 0.95 |
| 0.5                  | 10.0           | 50         |                |                       |                       | 0.95 | 3.12·10 <sup>-4</sup> | 3.19·10 <sup>-4</sup> | 47.5                  | 0.93 |
| 0.5                  | 20.0           | 50         |                |                       |                       | 0.94 | 1.97·10 <sup>-4</sup> | 2.03·10 <sup>-4</sup> | 30.3                  | 0.88 |

Table over the fitted parameters at a scattering angle of 90°.
